# Supplementary material for: Principles of Electrophysiological Assessments for Movement Disorders
Source: PubMed Central journal article supplement — J Mov Disord. 2020 Jan 31;13(1):27–38. doi: 10.14802/jmd.19064 (PMC6987526; doi:10.14802/jmd.19064), 2020-01-31
Supplement: jmd-19064-suppl1.pdf [file jmd-19064-suppl1.pdf]

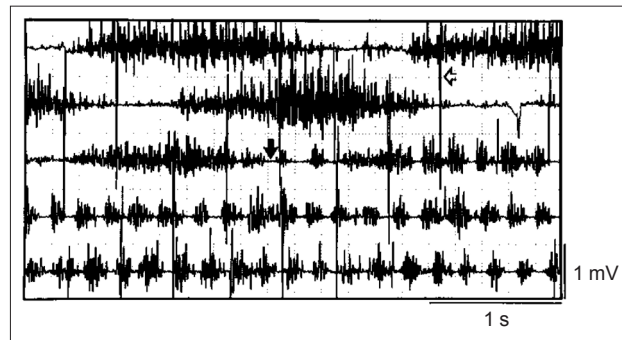

**Supplementary Figure 1.** Needle electromyography (EMG) recording of diaphragmatic myoclonus. The first two lines show normal rhythmic inspiratory EMG activity (4–5 Hz). The onset of diaphragmatic myoclonus interrupted the normal inspiratory rhythm, which is marked by the black arrow. The open arrow points to the cardiac pacemaker artifacts. Diaphragmatic myoclonus was not related to the pacemaker activities. Adapted from Chen et al.<sup>1</sup>
