# Supplementary material for: Principles of Electrophysiological Assessments for Movement Disorders
Source: PubMed Central journal article supplement — J Mov Disord. 2020 Jan 31;13(1):27–38. doi: 10.14802/jmd.19064 (PMC6987526; doi:10.14802/jmd.19064), 2020-01-31
Supplement: jmd-19064-suppl2.pdf [file jmd-19064-suppl2.pdf]

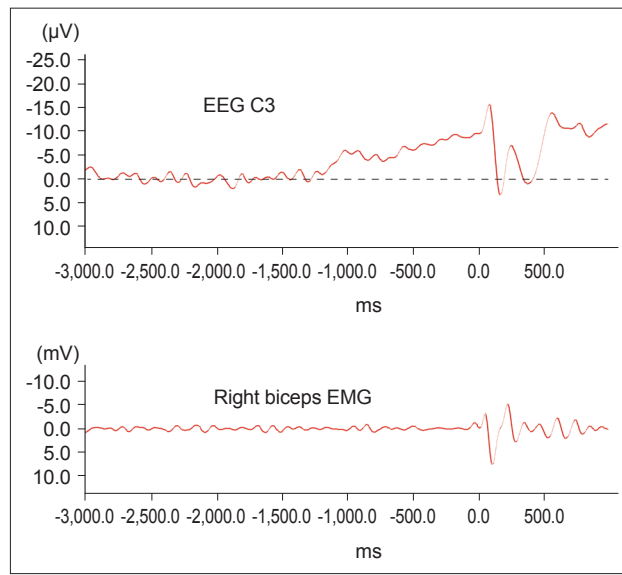

**Supplementary Figure 2.** Example of the Bereitschaftspotential in functional jerks. Recordings of electroencephalography (EEG) signals from the C3 electrode (upper trace) and EMG signals from the right biceps muscle (bottom trace) from a patient with functional right arm jerks. Forty trials were averaged. The EEG recordings show a Bereitschaftspotential, which is a slow, negative potential, with an onset about 1,500 ms before EMG onset. Time 0 = EMG onset. Adapted from Phielipp and Chen<sup>5</sup>.
