# Supplementary material for: Principles of Electrophysiological Assessments for Movement Disorders
Source: PubMed Central journal article supplement — J Mov Disord. 2020 Jan 31;13(1):27–38. doi: 10.14802/jmd.19064 (PMC6987526; doi:10.14802/jmd.19064), 2020-01-31
Supplement: jmd-19064-suppl3.pdf [file jmd-19064-suppl3.pdf]

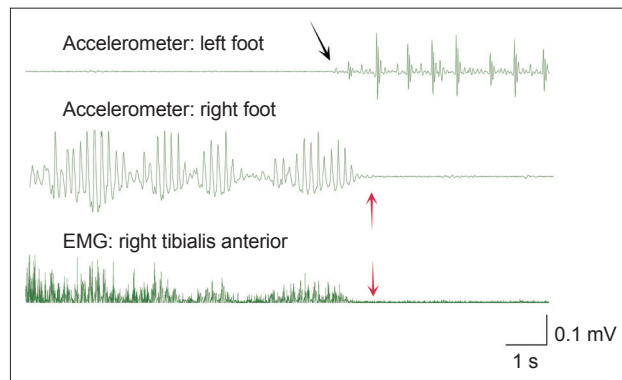

**Supplementary Figure 3.** Distraction in a patient with functional tremor. Accelerometer and EMG recordings from a patient with functional tremor of the right foot. The right foot tremor ceased when the patient started left foot tapping at 2 Hz. The black arrow indicates the start of left foot tapping, and the red arrows indicate the suppression of the tremors. This individual with right foot functional tremor also presents with variable tremor frequencies and EMG burst amplitudes. The top trace corresponds to the accelerometer signals recorded from the left foot and the middle trace corresponds to the accelerometer signals from the right foot. The bottom trace is the rectified EMG signal from the right tibialis anterior muscle.
