# Supplementary material for: Principles of Electrophysiological Assessments for Movement Disorders
Source: PubMed Central journal article supplement — J Mov Disord. 2020 Jan 31;13(1):27–38. doi: 10.14802/jmd.19064 (PMC6987526; doi:10.14802/jmd.19064), 2020-01-31
Supplement: jmd-19064-suppl4.pdf [file jmd-19064-suppl4.pdf]

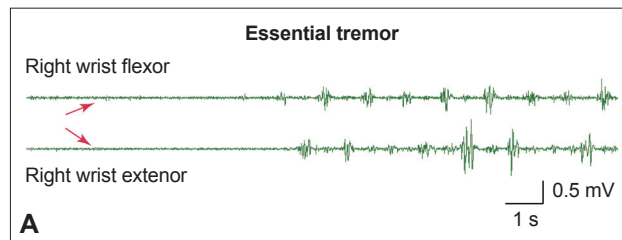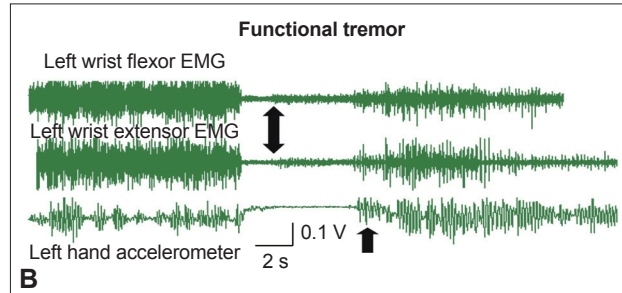

**Supplementary Figure 4.** Tonic coactivation sign in a patient with functional tremor. A: EMG signals recorded from the right wrist extensor and flexor muscles in a patient with essential tremor. There was no coactivation of the agonist and antagonist muscles before tremor onset (red arrows). B: EMG signals recorded from the left wrist extensor and flexor muscles in a patient with functional tremor. The black double-headed arrow indicates simultaneous EMG activation in both the agonist and antagonist muscles before tremor onset (single-headed black arrow).
