# Supplementary material for: Principles of Electrophysiological Assessments for Movement Disorders
Source: PubMed Central journal article supplement — J Mov Disord. 2020 Jan 31;13(1):27–38. doi: 10.14802/jmd.19064 (PMC6987526; doi:10.14802/jmd.19064), 2020-01-31
Supplement: jmd-19064-suppl5.pdf [file jmd-19064-suppl5.pdf]

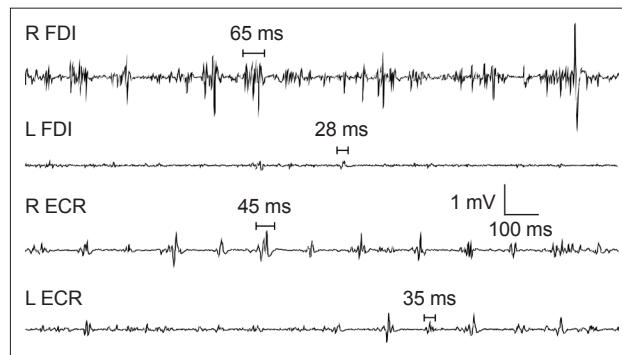

**Supplementary Figure 5.** Example of cortical myoclonus. The EMG burst duration was usually shorter than 70 ms. Adapted from Phelipp and Chen<sup>5</sup>. ECR: extensor carpi radialis muscle. R: right, L: left, FDI: first dorsal interosseous muscle.
