# Supplementary material for: Principles of Electrophysiological Assessments for Movement Disorders
Source: PubMed Central journal article supplement — J Mov Disord. 2020 Jan 31;13(1):27–38. doi: 10.14802/jmd.19064 (PMC6987526; doi:10.14802/jmd.19064), 2020-01-31
Supplement: jmd-19064-suppl6.pdf [file jmd-19064-suppl6.pdf]

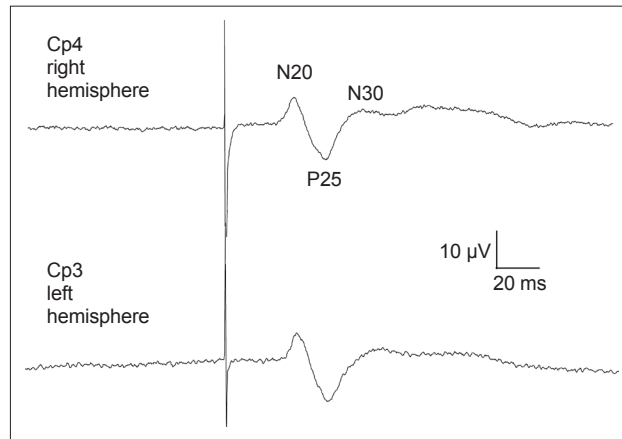

**Supplementary Figure 6.** Giant somatosensory evoked potentials in a patient with cortical myoclonus. Somatosensory evoked potentials recorded from a patient with cortical myoclonus. Recordings from both Cp3-Fz from right median nerve stimulation and Cp4-Fz from left median nerve stimulation both showed giant P25-N30 waves with amplitudes larger than 10  $\mu$ V.
