# Supplementary material for: Principles of Electrophysiological Assessments for Movement Disorders
Source: PubMed Central journal article supplement — J Mov Disord. 2020 Jan 31;13(1):27–38. doi: 10.14802/jmd.19064 (PMC6987526; doi:10.14802/jmd.19064), 2020-01-31
Supplement: jmd-19064-suppl7.pdf [file jmd-19064-suppl7.pdf]

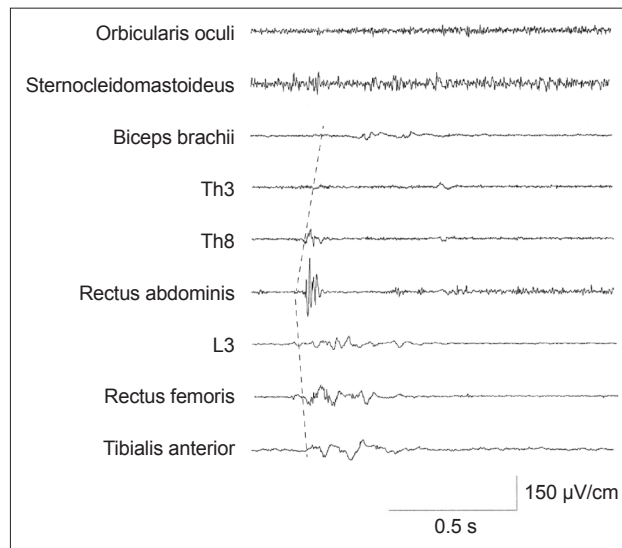

**Supplementary Figure 7.** Propriospinal myoclonus (PSM) with a secondary cause. EMG recording from a case of PSM induced by ciprofloxacin. The duration of the EMG burst varies from 80 to 400 ms. The dashed line indicates a rostral and caudal order of recruitment starting in the rectus abdominis muscle. The orbicularis oculi muscle was not involved in the jerks. Adapted from Post et al.<sup>54</sup>
